# Supplementary material for: Structure and dynamics of CO2and N2in a tetracyanoborate based ionic liquid
Source: Royal Society of Chemistry journal article supplement (doi:10.1039/c3cp54326a), 2013-11-22
Supplement: c3cp54326a.pdf [file c3cp54326a.pdf]

*Electronic Supplementary Information for*

# **Structure and Dynamics of CO<sub>2</sub> and N<sub>2</sub> in a Tetracyanoborate Based Ionic Liquid**

*Hongjun Liu,<sup>†</sup> Sheng Dai,<sup>†,§</sup> and De-en Jiang<sup>\*,†</sup>*

<sup>†</sup>Chemical Sciences Division, Oak Ridge National Laboratory, Oak Ridge, Tennessee 37831

<sup>§</sup>Department of Chemistry, University of Tennessee, Knoxville, Tennessee 37966

\*To whom correspondence should be addressed. E-mail: [jiangd@ornl.gov](mailto:jiangd@ornl.gov).

**Table S1.** Simulated density and diffusivity of the CO<sub>2</sub>/N<sub>2</sub> emimB(CN)<sub>4</sub> mixtures. The uncertainty in density is within 1% and in self-diffusivity within 10%, based on averaging over multiple independent runs.

| Temperature (K)         | Mole fraction (%) | Density (g/cm <sup>3</sup> ) | D <sub>+</sub> (10 <sup>-8</sup> m <sup>2</sup> /s) | D <sub>-</sub> (10 <sup>-8</sup> m <sup>2</sup> /s) | D <sub>solute</sub> (10 <sup>-8</sup> m <sup>2</sup> /s) |
|-------------------------|-------------------|------------------------------|-----------------------------------------------------|-----------------------------------------------------|----------------------------------------------------------|
| Neat IL                 |                   |                              |                                                     |                                                     |                                                          |
| 400                     |                   | 0.899                        | 0.093                                               | 0.073                                               |                                                          |
| 360                     |                   | 0.927                        | 0.047                                               | 0.037                                               |                                                          |
| 340                     |                   | 0.945                        | 0.028                                               | 0.023                                               |                                                          |
| 320                     |                   | 0.963                        | 0.017                                               | 0.013                                               |                                                          |
| 300                     |                   | 0.983                        | 0.009                                               | 0.006                                               |                                                          |
| CO <sub>2</sub> mixture |                   |                              |                                                     |                                                     |                                                          |
| 400                     | 2.5               | 0.891                        | 0.092                                               | 0.074                                               | 0.438                                                    |
| 360                     | 2.5               | 0.926                        | 0.047                                               | 0.038                                               | 0.254                                                    |
| 320                     | 2.5               | 0.964                        | 0.016                                               | 0.014                                               | 0.117                                                    |
| 300                     | 2.5               | 0.983                        | 0.010                                               | 0.007                                               | 0.075                                                    |
| 400                     | 5.0               | 0.890                        | 0.095                                               | 0.074                                               | 0.405                                                    |
| 400                     | 10.0              | 0.890                        | 0.102                                               | 0.081                                               | 0.397                                                    |
| N <sub>2</sub> mixture  |                   |                              |                                                     |                                                     |                                                          |
| 400                     | 2.5               | 0.888                        | 0.091                                               | 0.074                                               | 0.558                                                    |
| 360                     | 2.5               | 0.924                        | 0.048                                               | 0.039                                               | 0.286                                                    |
| 320                     | 2.5               | 0.962                        | 0.018                                               | 0.014                                               | 0.150                                                    |
| 300                     | 2.5               | 0.980                        | 0.009                                               | 0.008                                               | 0.089                                                    |
| 400                     | 5.0               | 0.886                        | 0.093                                               | 0.079                                               | 0.565                                                    |
| 400                     | 10.0              | 0.880                        | 0.094                                               | 0.081                                               | 0.577                                                    |

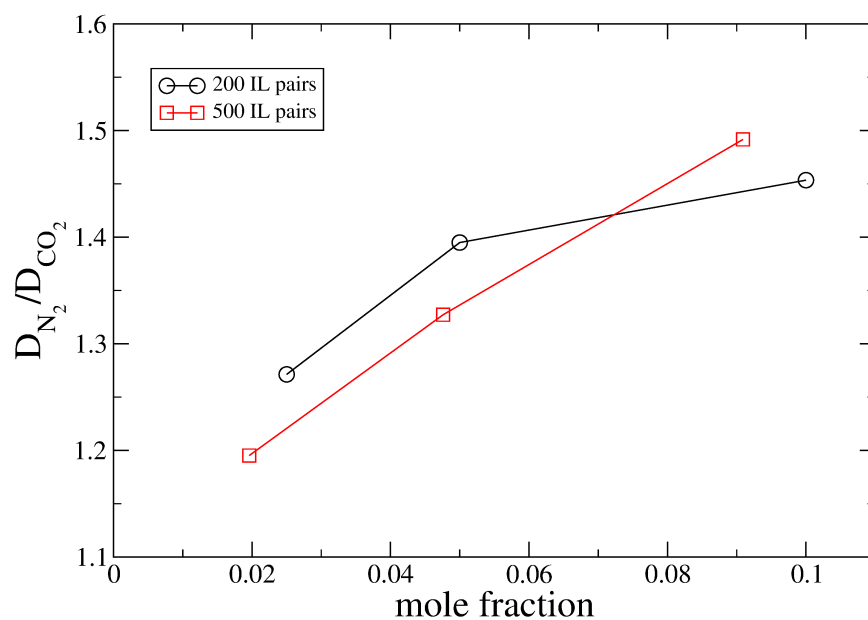

**Figure S1.** System size effect on the diffusivity ratio of  $D_{N_2}/D_{CO_2}$ .

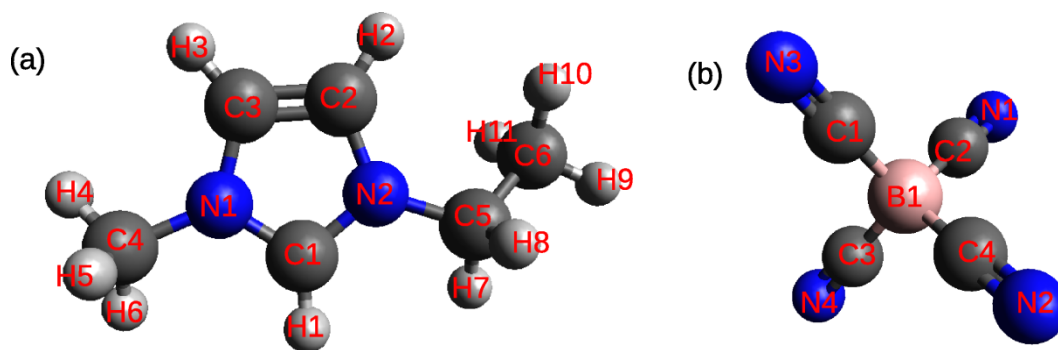

**Figure S2.** Atom names (in red) in the force fields of (a) emim cation and (b)  $B(CN)_4$  anion. Each atom is given an atom name from which one can readily retrieve the atom type information for the specific atom. Lennard-Jones and bonded parameters are categorized in atom types.

```
#####  
# Force field originally built via Antechamber using GAFF  
# For AMBER-style impropers, atom #3 is the central atom.  
#####  
FORCEFIELD 2MI
```

```
! ATOM:  
!! index (int): atom index  
!! name (str): atom name (required)  
!! mass (float, amu): atomic mass  
!! element (str): element symbol  
!! epsilon (float, Ken): LJ well depth  
!! sigma (float, angstrom): LJ zero-energy distance
```

```
ATOM name mass element epsilon sigma ! 8
```

```
cc 12.010 C 43.277 3.400 ! 1  
cd 12.010 C 43.277 3.400 ! 2  
na 14.010 N 85.547 3.250 ! 3  
h5 1.008 H 7.548 2.421 ! 4  
h4 1.008 H 7.548 2.511 ! 5  
c3 12.010 C 55.052 3.400 ! 6  
h1 1.008 H 7.901 2.471 ! 7  
hc 1.008 H 7.901 2.650 ! 8
```

```
! BOND:
```

```
!! harmonic:  $K * (R - R_0)^2$   
!!! K (float, Ken/angstrom^2): force constant  
!!! R0 (float, angstrom): equilibrium bond length  
!! fixed: R = R0  
!!! R0 (float, angstrom): equilibrium bond length
```

```
BOND ! 10
```

```
cc na harmonic 220812.0 1.371 ! 1 1.353  
cc h5 harmonic 179146.0 1.079 ! 2 1.080  
cc cd harmonic 253622.0 1.371 ! 3 1.363  
cc h4 harmonic 176177.0 1.083 ! 4 1.079  
cd na harmonic 220812.0 1.371 ! 5 1.383  
cd h4 harmonic 176177.0 1.083 ! 6 1.079  
c3 na harmonic 168427.0 1.456 ! 7 1.477  
c3 h1 harmonic 169031.0 1.093 ! 8 1.092  
c3 c3 harmonic 152526.0 1.535 ! 9 1.527  
c3 hc harmonic 169736.0 1.092 ! 10 1.094
```

```
! ANGLE:
```

```
!! harmonic:  $K * (A - A_0)^2$   
!!! K (float, Ken/radian^2): force constant  
!!! A0 (float, degrees): equilibrium angle  
!! fixed: A = A0  
!!! A0 (float, degrees): equilibrium angle
```

```
ANGLE ! 18
```

```
cc na cd harmonic 32146.0 128.01 ! 1 108.328  
c3 na cc harmonic 31481.0 125.09 ! 2 125.847  
cc na cc harmonic 34692.0 109.90 ! 3 108.324  
cc cd na harmonic 36690.0 109.42 ! 4 107.113  
cc cd h4 harmonic 23747.0 129.11 ! 5 130.932  
cd cc h4 harmonic 23747.0 129.11 ! 6 130.728  
cd cc na harmonic 36690.0 109.42 ! 7 107.214  
c3 na cd harmonic 31481.0 125.09 ! 8 125.776
```

```
h5  cc  na  harmonic  25040.0  122.10  ! 9  125.489
na  cc  na  harmonic  37062.0  109.33  ! 10 109.020
h4  cd  na  harmonic  25272.0  119.66  ! 11 121.954
h1  c3  na  harmonic  25111.0  109.45  ! 12 108.213
h4  cc  na  harmonic  25272.0  119.66  ! 13 122.057
c3  c3  na  harmonic  33077.0  112.81  ! 14 112.336
h1  c3  h1  harmonic  19716.0  109.55  ! 15 109.162
c3  c3  hc  harmonic  23334.0  110.05  ! 16 110.640
c3  c3  h1  harmonic  23329.0  110.07  ! 17 111.646
hc  c3  hc  harmonic  19842.0  108.35  ! 18 108.266
```

! DIHEDRAL:

!! charmm:  $K_n * (1 + \cos(N * A - A_0))$

!!!  $K_n$  (float, Ken): interaction energy

!!!  $N$  (int): periodicity

!!!  $A_0$  (float, degrees): equilibrium angle

!! opls:  $K_1 * (1 + \cos(A)) + K_2 * (1 - \cos(2 * A)) + K_3 * (1 + \cos(3 * A)) + K_4 * (1 - \cos(4 * A))$

!!!  $K_1$  (float, Ken): interaction energy

!!!  $K_2$  (float, Ken): interaction energy

!!!  $K_3$  (float, Ken): interaction energy

!!!  $K_4$  (float, Ken): interaction energy

DIHEDRAL ! 23

```
cc  cd  na  cc  charmm  855.470  2  180.0  ! 1  -0.022
h4  cd  na  cc  charmm  855.470  2  180.0  ! 2 -179.606
h1  c3  na  cc  charmm   0.000  2   0.0    ! 3   8.438
cd  cc  na  cc  charmm  855.470  2  180.0  ! 4   0.146
h4  cc  na  cc  charmm  855.470  2  180.0  ! 5  179.866
c3  c3  na  cc  charmm  4822.97  1   0.0    # min: -199 max: 304 rms: 180
c3  c3  na  cc  charmm  -59.10  2  180.0  # min: -97 max: 137 rms: 86
c3  c3  na  cc  charmm  219.01  3   0.0    # min: -32 max: 19 rms: 17
c3  c3  na  cc  charmm  102.66  4  180.0  # min: -177 max: 222 rms: 139
cc  cd  na  c3  charmm  855.470  2  180.0  ! 7  179.568
na  cc  na  cc  charmm  855.470  2  180.0  ! 8  -0.161
h5  cc  na  cc  charmm  855.470  2  180.0  ! 9 -179.857
cd  cc  na  c3  charmm  855.470  2  180.0  ! 10 178.271
h5  cc  na  cd  charmm  855.470  2  180.0  ! 11 179.811
na  cc  na  cd  charmm  855.470  2  180.0  ! 12  0.114
h1  c3  na  cd  charmm   0.000  2   0.0    ! 13  59.507
na  cc  na  c3  charmm  855.470  2  180.0  ! 14 -178.882
h4  cc  cd  na  charmm  2012.880  2  180.0  ! 15 -179.763
na  cc  cd  na  charmm  2012.880  2  180.0  ! 16 -0.075
h5  cc  na  c3  charmm  855.470  2  180.0  ! 17  1.118
h4  cc  cd  h4  charmm  2012.880  2  180.0  ! 18 -0.230
h4  cc  na  c3  charmm  855.470  2  180.0  ! 19 -2.009
na  cc  cd  h4  charmm  2012.880  2  180.0  ! 20 179.458
h4  cd  na  c3  charmm  855.470  2  180.0  ! 21 -0.016
hc  c3  c3  na  charmm   78.500  3   0.0    ! 22  60.022
h1  c3  c3  hc  charmm   78.500  3   0.0    ! 23 -0.131
```

! IMPROPER:

!! cosine:  $K_n * (1 + \cos(N * A - A_0))$

!!!  $K_n$  (float, Ken): interaction energy

!!!  $N$  (int): periodicity

!!!  $A_0$  (float, degrees): equilibrium angle

!! harmonic:  $K * (A - A_0)^2$

!!!  $K$  (float, Ken/radian<sup>2</sup>): force constant

```
!!! A0 (float, degrees): equilibrium angle
IMPROPER ! 5
  h5  na  cc  na cosine  553.540  2  180.0  ! 1 -179.697
  cd  h4  cc  na cosine  553.540  2  180.0  ! 2 -179.648
  cc  h4  cd  na cosine  553.540  2  180.0  ! 3  179.474
  c3  cc  na  cd cosine  553.540  2  180.0  ! 4  179.589
  c3  cc  na  cc cosine  553.540  2  180.0  ! 5 -178.125
```

#### MOLECULE 2MI

```
! ATOM:
!! index (int): atom index
!! name (str): atom name (required)
!! type (str): atomtype name
!! charge (float, e): partial atomic charge
!! x (float, angstrom): atom coordinate
!! y (float, angstrom): atom coordinate
!! z (float, angstrom): atom coordinate
```

```
ATOM name type charge x y z ! 19
  C1  cc -0.090000 -1.89400 -0.67700 0.15500 ! 1
  C2  cc -0.121000 -0.17900 0.67000 -0.17500 ! 2
  C3  cd -0.145000 -1.31200 1.42800 -0.16400 ! 3
  N1  na 0.191000 -2.37500 0.56800 0.04400 ! 4
  H1  h5 0.186000 -2.48600 -1.56400 0.32500 ! 5
  H2  h4 0.189000 0.85500 0.95100 -0.30400 ! 6
  H3  h4 0.185000 -1.45200 2.49200 -0.27800 ! 7
  N2  na 0.044000 -0.56300 -0.64300 0.02800 ! 8
  C4  c3 -0.286000 -3.79000 0.95700 0.13700 ! 9
  H4  h1 0.139000 -4.09400 1.44300 -0.79200 ! 10
  H5  h1 0.139000 -4.39300 0.06300 0.29500 ! 11
  H6  h1 0.139000 -3.92400 1.64000 0.97800 ! 12
  C5  c3 0.015000 0.34100 -1.81900 0.05500 ! 13
  C6  c3 -0.141000 0.84200 -2.19800 -1.33700 ! 14
  H7  h1 0.076000 -0.22200 -2.63500 0.51500 ! 15
  H8  h1 0.076000 1.16500 -1.56700 0.72700 ! 16
  H9  hc 0.068000 0.01400 -2.46200 -2.00100 ! 17
  H10 hc 0.068000 1.41500 -1.38600 -1.79500 ! 18
  H11 hc 0.068000 1.50200 -3.06700 -1.25100 ! 19
```

```
! BOND:
```

```
BOND ! 19
  C1  N1  ! 1  1.339
  C1  H1  ! 2  1.080
  C1  N2  ! 3  1.337
  C2  C3  ! 4  1.363
  C2  H2  ! 5  1.079
  C2  N2  ! 6  1.383
  C3  N1  ! 7  1.383
  C3  H3  ! 8  1.079
  C4  N1  ! 9  1.470
  C5  N2  ! 10 1.484
  C4  H4  ! 11 1.092
  C4  H5  ! 12 1.090
  C4  H6  ! 13 1.092
  C5  C6  ! 14 1.527
  C5  H7  ! 15 1.093
```

|    |     |   |    |       |
|----|-----|---|----|-------|
| C5 | H8  | ! | 16 | 1.093 |
| C6 | H9  | ! | 17 | 1.094 |
| C6 | H10 | ! | 18 | 1.094 |
| C6 | H11 | ! | 19 | 1.095 |

! ANGLE:

ANGLE ! 33

|     |    |     |   |    |         |
|-----|----|-----|---|----|---------|
| C1  | N1 | C3  | ! | 1  | 108.328 |
| C1  | N1 | C4  | ! | 2  | 125.894 |
| C1  | N2 | C2  | ! | 3  | 108.324 |
| C1  | N2 | C5  | ! | 4  | 125.769 |
| C2  | C3 | N1  | ! | 5  | 107.113 |
| C2  | C3 | H3  | ! | 6  | 130.932 |
| C2  | N2 | C5  | ! | 7  | 125.878 |
| C3  | C2 | H2  | ! | 8  | 130.728 |
| C3  | C2 | N2  | ! | 9  | 107.214 |
| C3  | N1 | C4  | ! | 10 | 125.776 |
| H1  | C1 | N1  | ! | 11 | 125.431 |
| N1  | C1 | N2  | ! | 12 | 109.020 |
| H3  | C3 | N1  | ! | 13 | 121.954 |
| H4  | C4 | N1  | ! | 14 | 109.386 |
| H5  | C4 | N1  | ! | 15 | 108.940 |
| H6  | C4 | N1  | ! | 16 | 109.412 |
| H1  | C1 | N2  | ! | 17 | 125.548 |
| H2  | C2 | N2  | ! | 18 | 122.057 |
| C6  | C5 | N2  | ! | 19 | 112.336 |
| H7  | C5 | N2  | ! | 20 | 106.595 |
| H8  | C5 | N2  | ! | 21 | 106.731 |
| H4  | C4 | H5  | ! | 22 | 109.542 |
| H4  | C4 | H6  | ! | 23 | 110.053 |
| H5  | C4 | H6  | ! | 24 | 109.488 |
| C5  | C6 | H9  | ! | 25 | 111.403 |
| C5  | C6 | H10 | ! | 26 | 111.661 |
| C5  | C6 | H11 | ! | 27 | 108.857 |
| C6  | C5 | H7  | ! | 28 | 111.552 |
| C6  | C5 | H8  | ! | 29 | 111.740 |
| H7  | C5 | H8  | ! | 30 | 107.566 |
| H10 | C6 | H9  | ! | 31 | 108.750 |
| H11 | C6 | H9  | ! | 32 | 108.213 |
| H10 | C6 | H11 | ! | 33 | 107.834 |

! DIHEDRAL:

DIHEDRAL ! 41

|    |    |    |    |   |    |          |
|----|----|----|----|---|----|----------|
| H1 | C1 | N1 | C3 | ! | 1  | 179.811  |
| N2 | C1 | N1 | C3 | ! | 2  | 0.114    |
| H1 | C1 | N1 | C4 | ! | 3  | 0.221    |
| N2 | C1 | N1 | C4 | ! | 4  | -179.475 |
| N1 | C1 | N2 | C2 | ! | 5  | -0.161   |
| H1 | C1 | N2 | C2 | ! | 6  | -179.857 |
| N1 | C1 | N2 | C5 | ! | 7  | -178.289 |
| H1 | C1 | N2 | C5 | ! | 8  | 2.015    |
| H2 | C2 | C3 | N1 | ! | 9  | -179.763 |
| N2 | C2 | C3 | N1 | ! | 10 | -0.075   |
| H2 | C2 | C3 | H3 | ! | 11 | -0.230   |
| N2 | C2 | C3 | H3 | ! | 12 | 179.458  |
| C3 | C2 | N2 | C1 | ! | 13 | 0.146    |

```
H2 C2 N2 C1 ! 14 179.866
C3 C2 N2 C5 ! 15 178.271
H2 C2 N2 C5 ! 16 -2.009
C2 C3 N1 C1 ! 17 -0.022
H3 C3 N1 C1 ! 18 -179.606
C2 C3 N1 C4 ! 19 179.568
H3 C3 N1 C4 ! 20 -0.016
H4 C4 N1 C1 ! 21 -120.670
H4 C4 N1 C3 ! 22 59.811
H5 C4 N1 C1 ! 23 -0.957
H5 C4 N1 C3 ! 24 179.523
H6 C4 N1 C1 ! 25 118.706
H6 C4 N1 C3 ! 26 -60.814
C6 C5 N2 C1 ! 27 104.237
C6 C5 N2 C2 ! 28 -73.570
H7 C5 N2 C1 ! 29 -18.233
H7 C5 N2 C2 ! 30 163.961
H8 C5 N2 C1 ! 31 -132.968
H8 C5 N2 C2 ! 32 49.226
N2 C5 C6 H9 ! 33 -60.833
H7 C5 C6 H9 ! 34 58.788
H8 C5 C6 H9 ! 35 179.240
N2 C5 C6 H10 ! 36 60.980
H7 C5 C6 H10 ! 37 -179.399
H8 C5 C6 H10 ! 38 -58.947
N2 C5 C6 H11 ! 39 179.918
H7 C5 C6 H11 ! 40 -60.461
H8 C5 C6 H11 ! 41 59.992
```

! IMPROPER:

```
IMPROPER ! 5
H1 N1 C1 N2 ! 1 -179.697
C3 H2 C2 N2 ! 2 -179.648
C2 H3 C3 N1 ! 3 179.474
C4 C1 N1 C3 ! 4 179.589
C5 C2 N2 C1 ! 5 -178.125
```

#### FORCEFIELD BCN

! ATOM:

```
!! index (int): atom index
!! name (str): atom name (required)
!! mass (float, amu): atomic mass
!! element (str): element symbol
!! epsilon (float, Ken): LJ well depth
!! sigma (float, angstrom): LJ zero-energy distance
ATOM name mass element epsilon sigma ! 3
```

```
  c1 12.010 C 30.696 3.118 ! 1
  b  10.810 B 47.811 3.581 ! 2
  n1 14.010 N 85.554 3.401 ! 3
```

! BOND:

```
!! harmonic: K * (R - R0)**2
```

```
!!! K (float, Ken/angstrom^2): force constant
```

```
!!! R0 (float, angstrom): equilibrium bond length
```



```
!! fixed: R = R0
!!! R0 (float, angstrom): equilibrium bond length
BOND ! 2
  b   c1 harmonic  35228.3  1.572  ! 1   1.423
  c1  n1 harmonic  60389.7  1.150  ! 2   1.423

! ANGLE:
!! harmonic: K * (A - A0)**2
!!! K (float, Ken/radian^2): force constant
!!! A0 (float, degrees): equilibrium angle
!! fixed: A = A0
!!! A0 (float, degrees): equilibrium angle
ANGLE ! 2
  c1   b   c1 harmonic   50276.6  109.50  ! 1  109.471
  b    c1  n1 harmonic   50276.6  180.00  ! 2  180.00
```

### MOLECULE BCN

```
! ATOM:
!! index (int): atom index
!! name (str): atom name (required)
!! type (str): atomtype name
!! charge (float, e): partial atomic charge
!! x (float, angstrom): atom coordinate
!! y (float, angstrom): atom coordinate
!! z (float, angstrom): atom coordinate
ATOM name type charge x y z ! 5
  B1   b  0.200000   0.33500   0.55900  -0.84400  ! 1
  C1   c1 0.160000   1.75700   0.67700  -1.56700  ! 2
  C2   c1 0.160000  -0.62100  -0.39400  -1.70100  ! 3
  C3   c1 0.160000  -0.32500   2.01000  -0.72600  ! 4
  C4   c1 0.160000   0.53100  -0.05900   0.61800  ! 5
  N1   n1 -0.410000  -1.31700  -1.08700  -2.32500  ! 6
  N2   n1 -0.410000   0.67300  -0.50700   1.68200  ! 7
  N3   n1 -0.410000   2.79000   0.76300  -2.09300  ! 8
  N4   n1 -0.410000  -0.80600   3.06600  -0.64000  ! 9
```

```
! BOND:
BOND !8
  B1  C1  ! 1   1.423
  B1  C2  ! 2   1.423
  B1  C3  ! 3   1.423
  B1  C4  ! 4   1.423
  C1  N3  ! 5   1.423
  C2  N1  ! 6   1.423
  C3  N4  ! 7   1.423
  C4  N2  ! 8   1.423
```

```
! ANGLE:
ANGLE ! 6
  C1  B1  C2  ! 1  109.533
  C1  B1  C3  ! 2  109.463
  C1  B1  C4  ! 3  109.458
  C2  B1  C3  ! 4  109.463
  C2  B1  C4  ! 5  109.458
  C3  B1  C4  ! 6  109.453
```

|    |    |    |   |    |        |
|----|----|----|---|----|--------|
| B1 | C1 | N3 | ! | 7  | 180.00 |
| B1 | C2 | N1 | ! | 8  | 180.00 |
| B1 | C3 | N4 | ! | 9  | 180.00 |
| B1 | C4 | N2 | ! | 10 | 180.00 |
